# Supplementary material for: US Consumer Identification of the Health Benefits of Dietary Fiber and Consideration of Fiber When Making Food Choices
Source: MDPI journal article supplement (doi:10.3390/nu14112341), 2022-06-03
Supplement: s1 [file s1]

# US Consumer Identification of the Health Benefits of Dietary Fiber and Consideration of Fiber When Making Food Choices

Christopher R. Gustafson <sup>1,\*</sup> and Devin J. Rose <sup>2,3,4,\*</sup>

**Table S1.** Multivariate binary logistic regression of consideration of dietary fiber when making food choices (versus not considering fiber) using only FDA-recognized benefits and FDA-recognized benefits + supporting healthy gut bacteria (microbiome).

| Category                                                  | FDA-recognized<br>OR<br>(95% CI) <sup>a</sup> | FDA-recognized+Microbiome<br>OR<br>(95% CI) |
|-----------------------------------------------------------|-----------------------------------------------|---------------------------------------------|
| <b>BENEFITS RECOGNIZED (Ref: No benefits)<sup>b</sup></b> |                                               |                                             |
| One Benefit                                               | 3.01<br>(2.77, 3.28)                          | 3.90<br>(3.47, 4.40)                        |
| Two Benefits                                              | 5.02<br>(4.61, 5.47)                          | 6.55<br>(5.85, 7.35)                        |
| Three Benefits                                            | 7.14<br>(6.53, 7.82)                          | 10.03<br>(8.95, 11.27)                      |
| Four Benefits                                             | 9.42<br>(8.53, 10.41)                         | 13.79<br>(12.24, 15.58)                     |
| Five Benefits                                             | 13.14<br>(11.69, 14.79)                       | 17.18<br>(15.12, 19.57)                     |
| Six Benefits                                              | 14.34<br>(12.39, 16.61)                       | 23.72<br>(20.59, 27.39)                     |
| Seven Benefits                                            | NA <sup>c</sup>                               | 24.32<br>(20.63, 28.72)                     |
| <b>FEMALE (Ref.: Not female)</b>                          | 1.17<br>(1.11, 1.24)                          | 1.12<br>(1.05, 1.18)                        |
| <b>AGE (Ref:19–24 y)</b>                                  |                                               |                                             |
| 25–34 y                                                   | 1.10<br>(0.85, 1.45)                          | 1.09<br>(0.83, 1.43)                        |
| 35–44 y                                                   | 1.02<br>(0.79, 1.34)                          | 1.00<br>(0.77, 1.31)                        |
| 45–54 y                                                   | 1.03<br>(0.79, 1.34)                          | 1.00<br>(0.77, 1.31)                        |
| 55–64 y                                                   | 1.15<br>(0.89, 1.5)                           | 1.12<br>(0.86, 1.46)                        |
| 65 y and above                                            | 1.40<br>(1.09, 1.83)                          | 1.35<br>(1.04, 1.76)                        |

<sup>a</sup>Odds ratio (95% confidence interval); <sup>b</sup>Reference category; <sup>c</sup>Not applicable.
